# Supplementary material for: Systems Biology in Chronic Heart Failure—Identification of Potential miRNA Regulators
Source: MDPI journal article supplement (doi:10.3390/ijms232315226), 2022-12-03
Supplement: s1 [file s1]

# SUPPLEMENTAL MATERIAL

## Systems Biology in Chronic Heart Failure – Identification of Potential miRNAs Regulators

Vilella-Figuerola A<sup>1,2</sup>, Gallinat A<sup>1,2</sup>, Escate R<sup>1,3</sup>, Mirabet S<sup>3,4</sup>, Padró T<sup>1,3,†</sup> Badimon L<sup>1,3,5,†\*</sup>

<sup>1</sup>Cardiovascular-Program-ICCC, IR-Hospital Santa Creu i Sant Pau, IIB-Sant Pau, Barcelona, Spain

<sup>2</sup>Biochemistry and Molecular Biology Department, Universitat Autònoma de Barcelona (UAB),  
Barcelona, Spain

<sup>3</sup>Centro de Investigación Biomédica en Red Cardiovascular, Instituto de Salud Carlos III, Madrid, Spain

<sup>4</sup>Heart Failure Group, Cardiology Department, Hospital Santa Creu i Sant Pau, Barcelona, Spain

<sup>5</sup>UAB-Chair Cardiovascular Research, Barcelona, Spain

<sup>†</sup>This authors contributed equally to this work.

### \*Correspondence:

Prof. Lina Badimon

lbadimon@santpau.cat

Cardiovascular Program-ICCC

Research Institute Hospital de la Santa Creu i Sant Pau

Sant Antoni M<sup>a</sup> Claret 167, 08025 Barcelona, Spain

Phone: +34.935565882

Fax: +34.935565559

**Keywords:** miRNA, chronic heart failure, network, enrichment pathways, pathophysiology

## SUPPLEMENTAL FIGURES

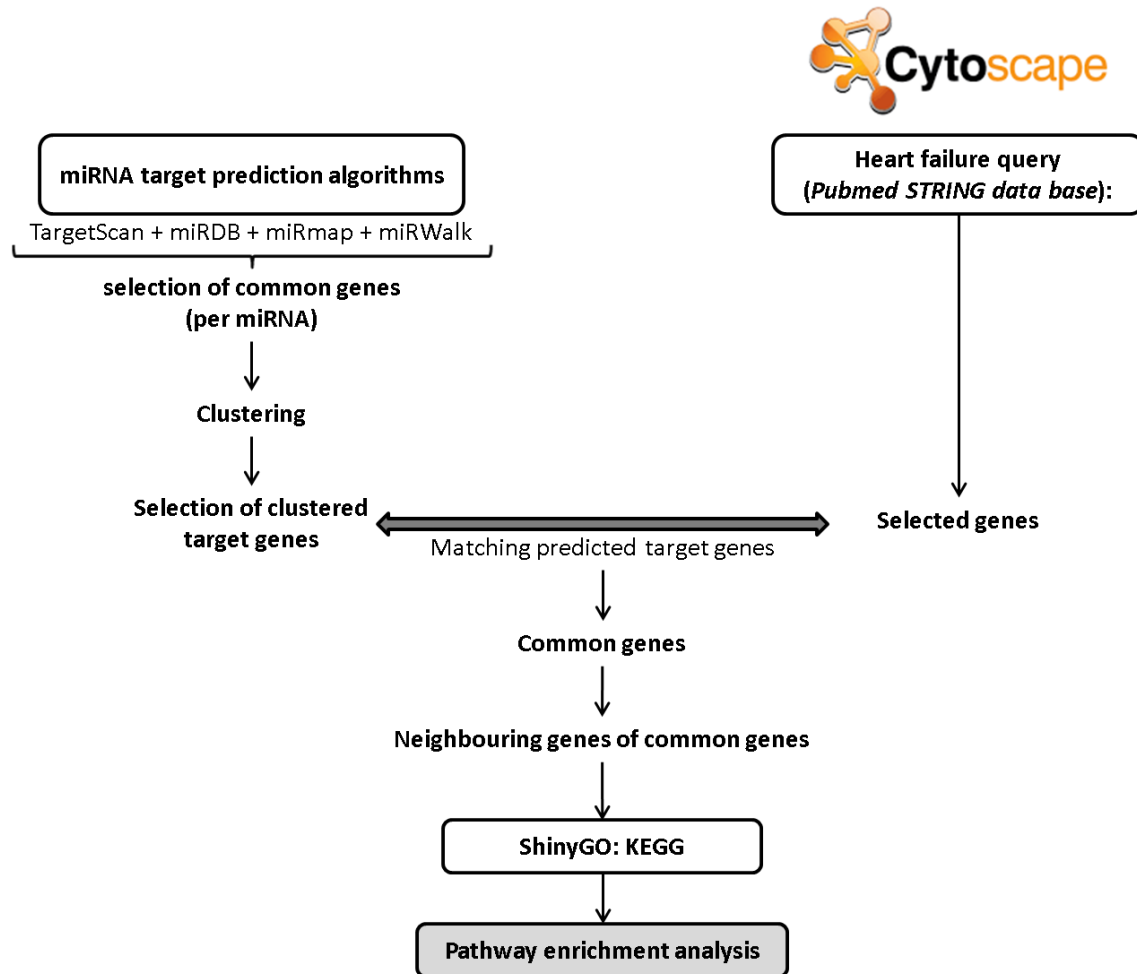

**Supplemental Figure S1:** Schematic representation of the *in silico* analysis of individual miRNAs.

## SUPPLEMENTAL TABLES

Supplemental Table S1: miRNA selection strategy

|                    | Fold-change (log <sub>2</sub> ) | AUC±SD (95% CI)                  | P-value      | Same family | miRBase reads      | Quartile reads |
|--------------------|---------------------------------|----------------------------------|--------------|-------------|--------------------|----------------|
| <i>let-7a-5p</i>   | -1.777                          | <b>0.842±0.063 (0.718–0.966)</b> | <b>0.001</b> | <b>1</b>    | <b>215,985,765</b> | <b>4</b>       |
| <i>miR-485-5p</i>  | -3.245                          | 0.823±0.085 (0.657–0.989)        | 0.004        | 0           | 3,168              | 1              |
| <i>miR-342-3p</i>  | -1.675                          | <b>0.772±0.079 (0.617–0.928)</b> | <b>0.005</b> | <b>0</b>    | <b>484,947</b>     | <b>3</b>       |
| <i>miR-30b-5p</i>  | -1.058                          | <b>0.760±0.087 (0.590–0.931)</b> | <b>0.011</b> | <b>0</b>    | <b>1,110,974</b>   | <b>3</b>       |
| <i>miR-335-5p</i>  | -0.995                          | <b>0.749±0.086 (0.582–0.917)</b> | <b>0.012</b> | <b>0</b>    | <b>416,898</b>     | <b>3</b>       |
| <i>miR-125a-5p</i> | -0.957                          | <b>0.748±0.080 (0.591–0.906)</b> | <b>0.012</b> | <b>0</b>    | <b>1,146,942</b>   | <b>3</b>       |
| <i>miR-150-5p</i>  | -1.270                          | <b>0.747±0.078 (0.594–0.900)</b> | <b>0.010</b> | <b>0</b>    | <b>117,587</b>     | <b>2</b>       |
| <i>miR-337-5p</i>  | -1.548                          | 0.741±0.093 (0.558–0.923)        | 0.020        | 0           | 4,424              | 1              |
| <i>miR-224-5p</i>  | -1.370                          | <b>0.741±0.095 (0.555–0.926)</b> | <b>0.020</b> | <b>0</b>    | <b>74,998</b>      | <b>2</b>       |
| <i>miR-494-3p</i>  | -1.223                          | 0.740±0.085 (0.574–0.907)        | 0.018        | 0           | 11,622             | 1              |
| <i>let-7g-5p</i>   | -0.791                          | 0.739±0.082 (0.579–0.899)        | 0.016        | 1           | 50,508,337         | 4              |
| <i>let-7f-5p</i>   | -0.973                          | 0.739±0.082 (0.579–0.899)        | 0.016        | 1           | 115,380,455        | 4              |
| <i>miR-107</i>     | -0.968                          | <b>0.737±0.090 (0.561–0.913)</b> | <b>0.018</b> | <b>0</b>    | <b>5,491,348</b>   | <b>4</b>       |
| <i>miR-495-3p</i>  | -0.894                          | 0.730±0.087 (0.560–0.900)        | 0.021        | 0           | 20,270             | 1              |
| <i>miR-139-5p</i>  | -1.299                          | <b>0.729±0.088 (0.555–0.902)</b> | <b>0.028</b> | <b>0</b>    | <b>85,265</b>      | <b>2</b>       |
| <i>miR-301a-3p</i> | -1.168                          | 0.726±0.096 (0.539–0.914)        | 0.034        | 0           | 81,204             | 2              |
| <i>miR-26a-5p</i>  | -0.558                          | 0.726±0.086 (0.557–0.895)        | 0.024        | 0           | 28,542,742         | 4              |
| <i>miR-328-3p</i>  | -0.740                          | 0.722±0.097 (0.532–0.911)        | 0.032        | 0           | 26,824             | 1              |
| <i>miR-142-3p</i>  | -0.840                          | 0.720±0.082 (0.559–0.881)        | 0.019        | 0           | 160,986            | 3              |
| <i>miR-377-3p</i>  | -1.001                          | 0.701±0.087 (0.530–0.872)        | 0.044        | 0           | 4,424              | 1              |
| <i>miR-374b-5p</i> | -0.593                          | 0.701±0.088 (0.530–0.873)        | 0.044        | 0           | 491,420            | 3              |
| <i>miR-369-3p</i>  | -1.062                          | 0.701±0.095 (0.514–0.887)        | 0.043        | 0           | 11,211             | 1              |
| <i>miR-574-3p</i>  | -0.763                          | 0.700±0.092 (0.521–0.879)        | 0.050        | 0           | 125,985            | 3              |
| <i>miR-323a-3p</i> | -0.659                          | 0.697±0.091 (0.518–0.875)        | 0.049        | 0           | 603                | 1              |
| <i>miR-451a</i>    | 0.421                           | 0.286±0.080 (0.130–0.442)        | 0.021        | 0           | 1,666,621          | 4              |
| <i>miR-424-5p</i>  | 0.726                           | 0.269±0.080 (0.113–0.426)        | 0.016        | 0           | 861,807            | 3              |
| <i>miR-660-5p</i>  | 0.591                           | 0.263±0.085 (0.096–0.431)        | 0.017        | 0           | 91,879             | 2              |
| <i>miR-210-3p</i>  | 1.137                           | 0.253±0.091 (0.075–0.432)        | 0.023        | 0           | 66,359             | 2              |

AUC: area under the curve; CI: confidence interval; SD: standard deviation. **In bold:** selected miRNAs.

**Selection strategy:** 1) Selection of top 15 best miRNAs according to AUC and fold-change. 2) Elimination of miRNAs from the same family (miRNAs with better AUC selected). 3) Elimination of miRNAs with low number of reads (4<sup>th</sup> quantile).

**Supplemental Table S2: Expression values of analysed miRNAs**

| <b>miRNA</b>       | <b>CTL (n=26)<br/>median [IQR]</b> | <b>cHF (n=46)<br/>median [IQR]</b> | <b>p-value</b> | <b>Fold-change (log<sub>2</sub>)</b> |
|--------------------|------------------------------------|------------------------------------|----------------|--------------------------------------|
| <i>let-7a-5p</i>   | 0.00045 [0.00008–0.00158]          | 0.00012 [0.00003–0.0003]           | <b>0.004</b>   | 0.266 (–1.911)                       |
| <i>miR-107</i>     | 0.00004 [0.00002–0.0001]           | 0.00002 [0.000003–0.00005]         | <b>0.044</b>   | 0.620 (–0.689)                       |
| <i>miR-125a-5p</i> | 0.00121 [0.00041–0.00167]          | 0.00031 [0.00012–0.00059]          | <b>0.002</b>   | 0.252 (–1.987)                       |
| <i>miR-139-5p</i>  | 0.00006 [0.00002–0.00013]          | 0.00003 [0.00001–0.00005]          | <b>0.006</b>   | 0.456 (–1.133)                       |
| <i>miR-150-5p</i>  | 0.00521 [0.00288–0.0088]           | 0.0021 [0.00083–0.00372]           | <b>0.000</b>   | 0.403 (–1.312)                       |
| <i>miR-30b-5p</i>  | 0.00123 [0.00077–0.0042]           | 0.00053 [0.00032–0.00136]          | <b>0.007</b>   | 0.430 (–1.217)                       |
| <i>miR-335-5p</i>  | 0.00165 [0.00021–0.00331]          | 0.00065 [0.00019–0.00107]          | <b>0.048</b>   | 0.397 (–1.334)                       |
| <i>miR-342-3p</i>  | 0.0017 [0.00092–0.00338]           | 0.00045 [0.00013–0.00087]          | <b>0.000</b>   | 0.264 (–1.921)                       |
| <i>miR-224-5p</i>  | 0.00006 [0.00002–0.00019]          | 0.00003 [0.00001–0.00007]          | 0.079          | 0.486 (–1.040)                       |
| <i>miR-16-5p</i>   | 0.00603 [0.0027–0.00943]           | 0.00511 [0.00249–0.00843]          | 0.694          | 0.847 (–0.240)                       |
| <i>miR-223-3p</i>  | 0.0243 [0.01047–0.03971]           | 0.01508 [0.00857–0.03479]          | 0.226          | 0.621 (–0.688)                       |

**cHF**: chronic heart failure; **CTL**: controls; **IQR**: interquartile range

Bold indicates statistical significance.

**Supplemental Table S3: Pathways identified by enrichment analysis included in Figure 3**

|                  | DESCRIPTION - KEGG                                        | FDR value              | Genes<br>(background genes) | Fold<br>enrichment |
|------------------|-----------------------------------------------------------|------------------------|-----------------------------|--------------------|
| <b>CLUSTER 1</b> |                                                           |                        |                             |                    |
| hsa04510         | Focal adhesion                                            | $5.52 \times 10^{-21}$ | 21 (198)                    | 10.61              |
| hsa04062         | Chemokine signalling pathway                              | $3.89 \times 10^{-20}$ | 20 (186)                    | 10.75              |
| hsa04014         | Ras signalling pathway                                    | $4.27 \times 10^{-20}$ | 21 (226)                    | 9.29               |
| hsa04151         | PI3K-Akt signalling pathway                               | $4.67 \times 10^{-19}$ | 23 (350)                    | 6.57               |
| hsa04917         | Prolactin signalling pathway                              | $1.60 \times 10^{-17}$ | 14 (69)                     | 20.29              |
| hsa01522         | Endocrine resistance                                      | $2.05 \times 10^{-17}$ | 15 (95)                     | 15.79              |
| hsa04926         | Relaxin signalling pathway                                | $3.37 \times 10^{-17}$ | 16 (128)                    | 12.5               |
| hsa04915         | Oestrogen signalling pathway                              | $1.66 \times 10^{-15}$ | 15 (133)                    | 11.28              |
| hsa01521         | EGFR tyrosine kinase inhibitor resistance                 | $2.11 \times 10^{-15}$ | 13 (78)                     | 16.67              |
| hsa04012         | ErbB signalling pathway                                   | $4.02 \times 10^{-15}$ | 13 (83)                     | 15.66              |
| hsa04935         | Growth hormone synthesis, secretion and action            | $8.07 \times 10^{-15}$ | 14 (118)                    | 11.86              |
| hsa04015         | Rap1 signalling pathway                                   | $1.82 \times 10^{-14}$ | 16 (202)                    | 7.92               |
| hsa04810         | Regulation of actin cytoskeleton                          | $2.82 \times 10^{-14}$ | 16 (209)                    | 7.66               |
| hsa04722         | Neurotrophin signalling pathway                           | $1.24 \times 10^{-13}$ | 13 (114)                    | 11.4               |
| hsa04912         | GnRH signalling pathway                                   | $2.20 \times 10^{-13}$ | 12 (89)                     | 13.48              |
| hsa04933         | AGE-RAGE signalling pathway in diabetic complications     | $5.44 \times 10^{-13}$ | 12 (98)                     | 12.24              |
| hsa04910         | Insulin signalling pathway                                | $6.05 \times 10^{-13}$ | 13 (133)                    | 9.77               |
| hsa04010         | MAPK signalling pathway                                   | $1.77 \times 10^{-12}$ | 16 (288)                    | 5.56               |
| hsa04370         | VEGF signalling pathway                                   | $2.44 \times 10^{-12}$ | 10 (57)                     | 17.54              |
| hsa04071         | Sphingolipid signalling pathway                           | $2.53 \times 10^{-12}$ | 12 (116)                    | 10.34              |
| hsa04919         | Thyroid hormone signalling pathway                        | $3.24 \times 10^{-12}$ | 12 (119)                    | 10.08              |
| hsa04611         | Platelet activation                                       | $4.01 \times 10^{-12}$ | 12 (122)                    | 9.84               |
| hsa04068         | FoxO signalling pathway                                   | $6.05 \times 10^{-12}$ | 12 (127)                    | 9.45               |
| hsa04520         | Adherens junction                                         | $8.53 \times 10^{-12}$ | 10 (67)                     | 14.93              |
| hsa04660         | T cell receptor signalling pathway                        | $1.30 \times 10^{-11}$ | 11 (101)                    | 10.89              |
| hsa04550         | Signalling pathways regulating pluripotency of stem cells | $1.54 \times 10^{-11}$ | 12 (140)                    | 8.57               |
| hsa04921         | Oxytocin signalling pathway                               | $2.84 \times 10^{-11}$ | 12 (149)                    | 8.05               |
| hsa04664         | Fc epsilon RI signalling pathway                          | $1.92 \times 10^{-10}$ | 9 (66)                      | 13.64              |
| hsa04625         | C-type lectin receptor signalling pathway                 | $2.67 \times 10^{-10}$ | 10 (102)                    | 9.8                |
| hsa04072         | Phospholipase D signalling pathway                        | $3.70 \times 10^{-10}$ | 11 (147)                    | 7.48               |
| hsa04150         | mTOR signalling pathway                                   | $4.77 \times 10^{-10}$ | 11 (151)                    | 7.28               |
| hsa04540         | Gap junction                                              | $1.43 \times 10^{-9}$  | 9 (87)                      | 10.34              |
| hsa05418         | Fluid shear stress and atherosclerosis                    | $2.03 \times 10^{-9}$  | 10 (130)                    | 7.69               |
| hsa04371         | Apelin signalling pathway                                 | $2.14 \times 10^{-9}$  | 10 (131)                    | 7.63               |
| hsa04929         | GnRH secretion                                            | $3.09 \times 10^{-9}$  | 8 (63)                      | 12.7               |
| hsa04670         | Leukocyte transendothelial migration                      | $8.23 \times 10^{-9}$  | 9 (109)                     | 8.26               |
| hsa04662         | B cell receptor signalling pathway                        | $1.36 \times 10^{-8}$  | 8 (78)                      | 10.26              |
| hsa04720         | Long-term potentiation                                    | $8.54 \times 10^{-8}$  | 7 (64)                      | 10.94              |
| hsa04024         | cAMP signalling pathway                                   | $1.16 \times 10^{-7}$  | 10 (208)                    | 4.81               |
| hsa04650         | Natural killer cell mediated cytotoxicity                 | $2.93 \times 10^{-7}$  | 8 (121)                     | 6.61               |
| hsa04210         | Apoptosis                                                 | $5.46 \times 10^{-7}$  | 8 (132)                     | 6.06               |
| hsa04211         | Longevity regulating pathway                              | $5.58 \times 10^{-7}$  | 7 (87)                      | 8.05               |
| hsa04270         | Vascular smooth muscle contraction                        | $5.64 \times 10^{-7}$  | 8 (133)                     | 6.02               |
| hsa04530         | Tight junction                                            | $1.76 \times 10^{-6}$  | 8 (156)                     | 5.13               |
| hsa04144         | Endocytosis                                               | $4.14 \times 10^{-6}$  | 9 (241)                     | 3.73               |
| hsa04666         | Fc gamma R-mediated phagocytosis                          | $1.18 \times 10^{-5}$  | 6 (90)                      | 6.67               |
| hsa04723         | Retrograde endocannabinoid signalling                     | $1.32 \times 10^{-5}$  | 7 (145)                     | 4.83               |
| hsa04218         | Cellular senescence                                       | $1.61 \times 10^{-5}$  | 7 (150)                     | 4.67               |
| hsa05142         | Chagas disease                                            | $1.91 \times 10^{-5}$  | 6 (99)                      | 6.06               |
| hsa04928         | Parathyroid hormone synthesis, secretion and action       | $2.34 \times 10^{-5}$  | 6 (103)                     | 5.83               |
| hsa04022         | cGMP-PKG signalling pathway                               | $2.53 \times 10^{-5}$  | 7 (162)                     | 4.32               |
| hsa04066         | HIF-1 signalling pathway                                  | $2.69 \times 10^{-5}$  | 6 (106)                     | 5.66               |
| hsa04668         | TNF signalling pathway                                    | $3.52 \times 10^{-5}$  | 6 (112)                     | 5.36               |
| hsa04960         | Aldosterone-regulated sodium reabsorption                 | $8.51 \times 10^{-5}$  | 4 (37)                      | 10.81              |
| hsa04261         | Adrenergic signalling in cardiomyocytes                   | $1.50 \times 10^{-4}$  | 6 (147)                     | 4.08               |
| hsa04657         | IL-17 signalling pathway                                  | $1.80 \times 10^{-4}$  | 5 (92)                      | 5.43               |
| hsa04930         | Type II diabetes mellitus                                 | $1.80 \times 10^{-4}$  | 4 (46)                      | 8.7                |

|                  | DESCRIPTION - KEGG                                        | FDR value              | Genes<br>(background genes) | Fold<br>enrichment |
|------------------|-----------------------------------------------------------|------------------------|-----------------------------|--------------------|
| hsa04750         | Inflammatory mediator regulation of TRP channels          | 1.90x10 <sup>-04</sup> | 5 (94)                      | 5.32               |
| hsa04630         | JAK-STAT signalling pathway                               | 2.20x10 <sup>-04</sup> | 6 (160)                     | 3.75               |
| hsa04620         | Toll-like receptor signalling pathway                     | 2.60x10 <sup>-04</sup> | 5 (101)                     | 4.95               |
| hsa04659         | Th17 cell differentiation                                 | 2.60x10 <sup>-04</sup> | 5 (101)                     | 4.95               |
| hsa01524         | Platinum drug resistance                                  | 7.90x10 <sup>-04</sup> | 4 (70)                      | 5.71               |
| hsa04918         | Thyroid hormone synthesis                                 | 9.60x10 <sup>-04</sup> | 4 (74)                      | 5.41               |
| hsa05412         | Arrhythmogenic right ventricular cardiomyopathy           | 0.001                  | 4 (76)                      | 5.26               |
| hsa04310         | Wnt signalling pathway                                    | 0.0016                 | 5 (154)                     | 3.25               |
| hsa04350         | TGF- $\beta$ signalling pathway                           | 0.0019                 | 4 (91)                      | 4.4                |
| hsa05414         | Dilated cardiomyopathy                                    | 0.0022                 | 4 (95)                      | 4.21               |
| hsa04621         | NOD-like receptor signalling pathway                      | 0.0026                 | 5 (174)                     | 2.87               |
| hsa04931         | Insulin resistance                                        | 0.0034                 | 4 (107)                     | 3.74               |
| hsa04961         | Endocrine and other factor-regulated calcium reabsorption | 0.0045                 | 3 (53)                      | 5.66               |
| hsa04923         | Regulation of lipolysis in adipocytes                     | 0.0047                 | 3 (54)                      | 5.56               |
| hsa04152         | AMPK signalling pathway                                   | 0.0049                 | 4 (120)                     | 3.33               |
| hsa05017         | Spinocerebellar ataxia                                    | 0.0074                 | 4 (135)                     | 2.96               |
| hsa04714         | Thermogenesis                                             | 0.008                  | 5 (229)                     | 2.18               |
| hsa04920         | Adipocytokine signalling pathway                          | 0.0088                 | 3 (69)                      | 4.35               |
| hsa04141         | Protein processing in endoplasmic reticulum               | 0.0142                 | 4 (165)                     | 2.42               |
| hsa04658         | Th1 and Th2 cell differentiation                          | 0.0158                 | 3 (87)                      | 3.45               |
| hsa04512         | ECM-receptor interaction                                  | 0.0162                 | 3 (88)                      | 3.41               |
| hsa05410         | Hypertrophic cardiomyopathy                               | 0.0166                 | 3 (89)                      | 3.37               |
| hsa04922         | Glucagon signalling pathway                               | 0.0229                 | 3 (101)                     | 2.97               |
| hsa04973         | Carbohydrate digestion and absorption                     | 0.0375                 | 2 (44)                      | 4.55               |
| <b>CLUSTER 2</b> |                                                           |                        |                             |                    |
| hsa04110         | Cell cycle                                                | 3.13x10 <sup>-14</sup> | 14 (120)                    | 11.67              |
| hsa04218         | Cellular senescence                                       | 7.40x10 <sup>-11</sup> | 12 (150)                    | 8                  |
| hsa04350         | TGF- $\beta$ signalling pathway                           | 2.47x10 <sup>-10</sup> | 10 (91)                     | 10.99              |
| hsa04659         | Th17 cell differentiation                                 | 2.89x10 <sup>-07</sup> | 8 (101)                     | 7.92               |
| hsa04550         | Signalling pathways regulating pluripotency of stem cells | 2.12x10 <sup>-06</sup> | 8 (140)                     | 5.71               |
| hsa01522         | Endocrine resistance                                      | 2.58x10 <sup>-06</sup> | 7 (95)                      | 7.37               |
| hsa04310         | Wnt signalling pathway                                    | 3.76x10 <sup>-06</sup> | 8 (154)                     | 5.19               |
| hsa04919         | Thyroid hormone signalling pathway                        | 9.76x10 <sup>-06</sup> | 7 (119)                     | 5.88               |
| hsa04068         | FoxO signalling pathway                                   | 1.38x10 <sup>-05</sup> | 7 (127)                     | 5.51               |
| hsa04330         | Notch signalling pathway                                  | 3.56x10 <sup>-05</sup> | 5 (52)                      | 9.62               |
| hsa04390         | Hippo signalling pathway                                  | 3.56x10 <sup>-05</sup> | 7 (153)                     | 4.58               |
| hsa04933         | AGE-RAGE signalling pathway in diabetic complications     | 3.56x10 <sup>-05</sup> | 6 (98)                      | 6.12               |
| hsa04520         | Adherens junction                                         | 9.10x10 <sup>-05</sup> | 5 (67)                      | 7.46               |
| hsa04371         | Apelin signalling pathway                                 | 0.0017                 | 5 (131)                     | 3.82               |
| hsa04917         | Prolactin signalling pathway                              | 0.0017                 | 4 (69)                      | 5.8                |
| hsa04115         | p53 signalling pathway                                    | 0.0019                 | 4 (72)                      | 5.56               |
| hsa04630         | JAK-STAT signalling pathway                               | 0.0036                 | 5 (160)                     | 3.13               |
| hsa05142         | Chagas disease                                            | 0.0052                 | 4 (99)                      | 4.04               |
| hsa04926         | Relaxin signalling pathway                                | 0.0125                 | 4 (128)                     | 3.13               |
| hsa05418         | Fluid shear stress and atherosclerosis                    | 0.0129                 | 4 (130)                     | 3.08               |
| hsa04658         | Th1 and Th2 cell differentiation                          | 0.0347                 | 3 (87)                      | 3.45               |
| hsa04657         | IL-17 signalling pathway                                  | 0.0395                 | 3 (92)                      | 3.26               |
| <b>CLUSTER 3</b> |                                                           |                        |                             |                    |
| hsa03013         | RNA transport                                             | 9.30x10 <sup>-05</sup> | 7 (160)                     | 4.38               |
| <b>CLUSTER 4</b> |                                                           |                        |                             |                    |
| hsa04120         | Ubiquitin mediated proteolysis                            | 3.14x10 <sup>-08</sup> | 9 (135)                     | 6.67               |
| hsa04310         | Wnt signalling pathway                                    | 1.22x10 <sup>-06</sup> | 8 (154)                     | 5.19               |
| hsa04390         | Hippo signalling pathway                                  | 0.00015                | 6 (153)                     | 3.92               |
| hsa04340         | Hedgehog signalling pathway                               | 0.0086                 | 3 (47)                      | 6.38               |
| hsa04550         | Signalling pathways regulating pluripotency of stem cells | 0.0128                 | 4 (140)                     | 2.86               |

**Supplemental Table S4: Pathways identified by enrichment analysis of miRNAs included in Figure 4**

|                  | DESCRIPTION - KEGG                                        | FDR value              | Genes<br>(background genes) | Fold enrichment |
|------------------|-----------------------------------------------------------|------------------------|-----------------------------|-----------------|
| <b>CLUSTER 1</b> |                                                           |                        |                             |                 |
| hsa04014         | Ras signalling pathway                                    | 5.82x10 <sup>-17</sup> | 18 (226)                    | 7.96            |
| hsa04510         | Focal adhesion                                            | 1.31x10 <sup>-16</sup> | 17 (198)                    | 8.59            |
| hsa04062         | Chemokine signalling pathway                              | 5.14x10 <sup>-13</sup> | 14 (186)                    | 7.53            |
| hsa04151         | PI3K-Akt signalling pathway                               | 5.14x10 <sup>-13</sup> | 17 (350)                    | 4.86            |
| hsa04012         | ErbB signalling pathway                                   | 1.19x10 <sup>-12</sup> | 11 (83)                     | 13.25           |
| hsa04810         | Regulation of actin cytoskeleton                          | 1.62x10 <sup>-12</sup> | 14 (209)                    | 6.70            |
| hsa04520         | Adherens junction                                         | 4.71x10 <sup>-12</sup> | 10 (67)                     | 14.93           |
| hsa01521         | EGFR tyrosine kinase inhibitor resistance                 | 1.72x10 <sup>-11</sup> | 10 (78)                     | 12.82           |
| hsa04015         | Rap1 signalling pathway                                   | 1.72x10 <sup>-11</sup> | 13 (202)                    | 6.44            |
| hsa04722         | Neurotrophin signalling pathway                           | 1.72x10 <sup>-11</sup> | 11 (114)                    | 9.65            |
| hsa01522         | Endocrine resistance                                      | 7.0x10 <sup>-11</sup>  | 10 (95)                     | 10.53           |
| hsa04917         | Prolactin signalling pathway                              | 1.31x10 <sup>-10</sup> | 9 (69)                      | 13.04           |
| hsa04010         | MAPK signalling pathway                                   | 6.06x10 <sup>-10</sup> | 13 (288)                    | 4.51            |
| hsa04370         | VEGF signalling pathway                                   | 9.97x10 <sup>-10</sup> | 8 (57)                      | 14.04           |
| hsa04625         | C-type lectin receptor signalling pathway                 | 2.4x10 <sup>-9</sup>   | 9 (102)                     | 8.82            |
| hsa04670         | Leukocyte transendothelial migration                      | 3.89x10 <sup>-9</sup>  | 9 (109)                     | 8.26            |
| hsa04071         | Sphingolipid signalling pathway                           | 5.46x10 <sup>-9</sup>  | 9 (116)                     | 7.76            |
| hsa04935         | Growth hormone synthesis, secretion and action            | 6.13x10 <sup>-9</sup>  | 9 (118)                     | 7.63            |
| hsa04068         | FoxO signalling pathway                                   | 1.1x10 <sup>-8</sup>   | 9 (127)                     | 7.09            |
| hsa04926         | Relaxin signalling pathway                                | 1.14x10 <sup>-8</sup>  | 9 (128)                     | 7.03            |
| hsa05418         | Fluid shear stress and atherosclerosis                    | 1.27x10 <sup>-8</sup>  | 9 (130)                     | 6.92            |
| hsa04910         | Insulin signalling pathway                                | 1.5x10 <sup>-8</sup>   | 9 (133)                     | 6.77            |
| hsa04912         | GnRH signalling pathway                                   | 1.5x10 <sup>-8</sup>   | 8 (89)                      | 8.99            |
| hsa04915         | Oestrogen signalling pathway                              | 1.5x10 <sup>-8</sup>   | 9 (133)                     | 6.77            |
| hsa04550         | Signalling pathways regulating pluripotency of stem cells | 2.14x10 <sup>-8</sup>  | 9 (140)                     | 6.43            |
| hsa04933         | AGE-RAGE signalling pathway in diabetic complications     | 2.88x10 <sup>-8</sup>  | 8 (98)                      | 8.16            |
| hsa04072         | Phospholipase D signalling pathway                        | 3.07x10 <sup>-8</sup>  | 9 (147)                     | 6.12            |
| hsa04921         | Oxytocin signalling pathway                               | 3.37x10 <sup>-8</sup>  | 9 (149)                     | 6.04            |
| hsa04660         | T cell receptor signalling pathway                        | 3.38x10 <sup>-8</sup>  | 8 (101)                     | 7.92            |
| hsa04919         | Thyroid hormone signalling pathway                        | 1.03x10 <sup>-7</sup>  | 8 (119)                     | 6.72            |
| hsa04611         | Platelet activation                                       | 1.21x10 <sup>-7</sup>  | 8 (122)                     | 6.56            |
| hsa04150         | mTOR signalling pathway                                   | 5.35x10 <sup>-7</sup>  | 8 (151)                     | 5.30            |
| hsa04664         | Fc epsilon RI signalling pathway                          | 1.16x10 <sup>-6</sup>  | 6 (66)                      | 9.09            |
| hsa04144         | Endocytosis                                               | 1.32x10 <sup>-6</sup>  | 9 (241)                     | 3.73            |
| hsa04024         | cAMP signalling pathway                                   | 4.82x10 <sup>-6</sup>  | 8 (208)                     | 3.85            |
| hsa04530         | Tight junction                                            | 8.49x10 <sup>-6</sup>  | 7 (156)                     | 4.49            |
| hsa04929         | GnRH secretion                                            | 1.93x10 <sup>-5</sup>  | 5 (63)                      | 7.94            |
| hsa04650         | Natural killer cell mediated cytotoxicity                 | 2.62x10 <sup>-5</sup>  | 6 (121)                     | 4.96            |
| hsa04371         | Apelin signalling pathway                                 | 3.94x10 <sup>-5</sup>  | 6 (131)                     | 4.58            |
| hsa04210         | Apoptosis                                                 | 4.06x10 <sup>-5</sup>  | 6 (132)                     | 4.55            |
| hsa04270         | Vascular smooth muscle contraction                        | 4.18x10 <sup>-5</sup>  | 6 (133)                     | 4.51            |
| hsa04662         | B cell receptor signalling pathway                        | 4.72x10 <sup>-5</sup>  | 5 (78)                      | 6.41            |
| hsa04540         | Gap junction                                              | 7.7x10 <sup>-5</sup>   | 5 (87)                      | 5.75            |
| hsa04218         | Cellular senescence                                       | 7.78x10 <sup>-5</sup>  | 6 (150)                     | 4.00            |
| hsa04666         | Fc gamma R-mediated phagocytosis                          | 8.79x10 <sup>-5</sup>  | 5 (90)                      | 5.56            |
| hsa04657         | IL-17 signalling pathway                                  | 9.61x10 <sup>-5</sup>  | 5 (92)                      | 5.43            |
| hsa04022         | cGMP-PKG signalling pathway                               | 1.1x10 <sup>-4</sup>   | 6 (162)                     | 3.70            |
| hsa04659         | Th17 cell differentiation                                 | 1.4x10 <sup>-4</sup>   | 5 (101)                     | 4.95            |
| hsa04066         | HIF-1 signalling pathway                                  | 1.7x10 <sup>-4</sup>   | 5 (106)                     | 4.72            |
| hsa04668         | TNF signalling pathway                                    | 2.2x10 <sup>-4</sup>   | 5 (112)                     | 4.46            |
| hsa04720         | Long-term potentiation                                    | 3.4x10 <sup>-4</sup>   | 4 (64)                      | 6.25            |
| hsa04920         | Adipocytokine signalling pathway                          | 4.5x10 <sup>-4</sup>   | 4 (69)                      | 5.80            |
| hsa05412         | Arrhythmogenic right ventricular cardiomyopathy           | 6.2x10 <sup>-4</sup>   | 4 (76)                      | 5.26            |
| hsa04211         | Longevity regulating pathway                              | 0.001                  | 4 (87)                      | 4.60            |
| hsa04350         | TGF-β signalling pathway                                  | 0.0012                 | 4 (91)                      | 4.40            |
| hsa04960         | Aldosterone-regulated sodium reabsorption                 | 0.0012                 | 3 (37)                      | 8.11            |
| hsa04621         | NOD-like receptor signalling pathway                      | 0.0014                 | 5 (174)                     | 2.87            |

| DESCRIPTION - KEGG |                                                           | FDR value              | Genes<br>(background genes) | Fold enrichment |
|--------------------|-----------------------------------------------------------|------------------------|-----------------------------|-----------------|
| hsa05142           | Chagas disease                                            | 0.0015                 | 4 (99)                      | 4.04            |
| hsa04620           | Toll-like receptor signalling pathway                     | 0.0016                 | 4 (101)                     | 3.96            |
| hsa04928           | Parathyroid hormone synthesis, secretion and action       | 0.0018                 | 4 (103)                     | 3.88            |
| hsa04931           | Insulin resistance                                        | 0.002                  | 4 (107)                     | 3.74            |
| hsa04930           | Type II diabetes mellitus                                 | 0.0021                 | 3 (46)                      | 6.52            |
| hsa04723           | Retrograde endocannabinoid signalling                     | 0.0058                 | 4 (145)                     | 2.76            |
| hsa04261           | Adrenergic signalling in cardiomyocytes                   | 0.006                  | 4 (147)                     | 2.72            |
| hsa01524           | Platinum drug resistance                                  | 0.0065                 | 3 (70)                      | 4.29            |
| hsa04310           | Wnt signalling pathway                                    | 0.0069                 | 4 (154)                     | 2.60            |
| hsa04630           | JAK-STAT signalling pathway                               | 0.0078                 | 4 (160)                     | 2.50            |
| hsa04141           | Protein processing in endoplasmic reticulum               | 0.0087                 | 4 (165)                     | 2.42            |
| hsa04658           | Th1 and Th2 cell differentiation                          | 0.0112                 | 3 (87)                      | 3.45            |
| hsa05410           | Hypertrophic cardiomyopathy                               | 0.0118                 | 3 (89)                      | 3.37            |
| hsa05414           | Dilated cardiomyopathy                                    | 0.0137                 | 3 (95)                      | 3.16            |
| hsa04110           | Cell cycle                                                | 0.025                  | 3 (120)                     | 2.50            |
| hsa04152           | AMPK signalling pathway                                   | 0.025                  | 3 (120)                     | 2.50            |
| hsa04217           | Necroptosis                                               | 0.0428                 | 3 (149)                     | 2.01            |
| hsa05416           | Viral myocarditis                                         | 0.0439                 | 2 (55)                      | 3.64            |
| hsa04390           | Hippo signalling pathway                                  | 0.0451                 | 3 (153)                     | 1.96            |
| <b>CLUSTER 2</b>   |                                                           |                        |                             |                 |
| hsa04330           | Notch signalling pathway                                  | 1.44x10 <sup>-6</sup>  | 6 (52)                      | 11.54           |
| hsa04350           | TGF- $\beta$ signalling pathway                           | 1.44x10 <sup>-6</sup>  | 7 (91)                      | 7.69            |
| hsa04110           | Cell cycle                                                | 5.51x10 <sup>-6</sup>  | 7 (120)                     | 5.83            |
| hsa04919           | Thyroid hormone signalling pathway                        | 5.51x10 <sup>-6</sup>  | 7 (119)                     | 5.88            |
| hsa04218           | Cellular senescence                                       | 2.2x10 <sup>-4</sup>   | 6 (150)                     | 4.00            |
| hsa04310           | Wnt signalling pathway                                    | 2.4x10 <sup>-4</sup>   | 6 (154)                     | 3.90            |
| hsa01522           | Endocrine resistance                                      | 3.2x10 <sup>-4</sup>   | 5 (95)                      | 5.26            |
| hsa04659           | Th17 cell differentiation                                 | 3.7x10 <sup>-4</sup>   | 5 (101)                     | 4.95            |
| hsa04520           | Adherens junction                                         | 0.0012                 | 4 (67)                      | 5.97            |
| hsa04550           | Signalling pathways regulating pluripotency of stem cells | 0.0013                 | 5 (140)                     | 3.57            |
| hsa04068           | FoxO signalling pathway                                   | 0.0095                 | 4 (127)                     | 3.15            |
| hsa05418           | Fluid shear stress and atherosclerosis                    | 0.0099                 | 4 (130)                     | 3.08            |
| hsa04917           | Prolactin signalling pathway                              | 0.0159                 | 3 (69)                      | 4.35            |
| hsa04658           | Th1 and Th2 cell differentiation                          | 0.0273                 | 3 (87)                      | 3.45            |
| hsa04933           | AGE-RAGE signalling pathway in diabetic complications     | 0.0355                 | 3 (98)                      | 3.06            |
| hsa04024           | cAMP signalling pathway                                   | 0.0374                 | 4 (208)                     | 1.92            |
| hsa04066           | HIF-1 signalling pathway                                  | 0.0415                 | 3 (106)                     | 2.83            |
| <b>CLUSTER 3</b>   |                                                           |                        |                             |                 |
| hsa04120           | Ubiquitin mediated proteolysis                            | 2.34x10 <sup>-12</sup> | 11 (135)                    | 8.15            |
| hsa04310           | Wnt signalling pathway                                    | 6.6x10 <sup>-6</sup>   | 7 (154)                     | 4.55            |
| hsa04390           | Hippo signalling pathway                                  | 6.18x10 <sup>-5</sup>  | 6 (153)                     | 3.92            |
| hsa04340           | Hedgehog signalling pathway                               | 0.0057                 | 3 (47)                      | 6.38            |
| hsa04550           | Signalling pathways regulating pluripotency of stem cells | 0.007                  | 4 (140)                     | 2.86            |
| <b>CLUSTER 4</b>   |                                                           |                        |                             |                 |
| hsa03013           | RNA transport                                             | 8.56x10 <sup>-5</sup>  | 6 (160)                     | 3.75            |
| hsa03040           | Spliceosome                                               | 0.0115                 | 4 (132)                     | 3.03            |
| <b>CLUSTER 5</b>   |                                                           |                        |                             |                 |
| hsa04742           | Taste transduction                                        | 1.38x10 <sup>-5</sup>  | 4 (81)                      | 4.94            |

**Supplemental Table S5: Pathways identified by enrichment analysis of miRNAs included in Figure 5**

|                  | DESCRIPTION - KEGG                                        | FDR value              | Genes<br>(background genes) | Fold enrichment |
|------------------|-----------------------------------------------------------|------------------------|-----------------------------|-----------------|
| <b>CLUSTER 1</b> |                                                           |                        |                             |                 |
| hsa04917         | Prolactin signalling pathway                              | 1.02x10 <sup>-13</sup> | 9 (69)                      | 13.04           |
| hsa01522         | Endocrine resistance                                      | 4.11x10 <sup>-11</sup> | 8 (95)                      | 8.42            |
| hsa01521         | EGFR tyrosine kinase inhibitor resistance                 | 5.55x10 <sup>-10</sup> | 7 (78)                      | 8.97            |
| hsa04151         | PI3K-Akt signalling pathway                               | 5.55x10 <sup>-10</sup> | 10 (350)                    | 2.86            |
| hsa04012         | ErbB signalling pathway                                   | 6.43x10 <sup>-10</sup> | 7 (83)                      | 8.43            |
| hsa04630         | JAK-STAT signalling pathway                               | 8.82x10 <sup>-10</sup> | 8 (160)                     | 5.00            |
| hsa04933         | AGE-RAGE signalling pathway in diabetic complications     | 1.55x10 <sup>-9</sup>  | 7 (98)                      | 7.14            |
| hsa04062         | Chemokine signalling pathway                              | 2.29x10 <sup>-9</sup>  | 8 (186)                     | 4.30            |
| hsa04935         | Growth hormone synthesis, secretion and action            | 4.45x10 <sup>-9</sup>  | 7 (118)                     | 5.93            |
| hsa04068         | FoxO signalling pathway                                   | 6.54x10 <sup>-9</sup>  | 7 (127)                     | 5.51            |
| hsa04926         | Relaxin signalling pathway                                | 6.54x10 <sup>-9</sup>  | 7 (128)                     | 5.47            |
| hsa04915         | Oestrogen signalling pathway                              | 7.42x10 <sup>-9</sup>  | 7 (133)                     | 5.26            |
| hsa04659         | Th17 cell differentiation                                 | 6.3x10 <sup>-8</sup>   | 6 (101)                     | 5.94            |
| hsa04625         | C-type lectin receptor signalling pathway                 | 6.35x10 <sup>-8</sup>  | 6 (102)                     | 5.88            |
| hsa05418         | Fluid shear stress and atherosclerosis                    | 1.98x10 <sup>-7</sup>  | 6 (130)                     | 4.62            |
| hsa04210         | Apoptosis                                                 | 2.08x10 <sup>-7</sup>  | 6 (132)                     | 4.55            |
| hsa04550         | Signalling pathways regulating pluripotency of stem cells | 2.82x10 <sup>-7</sup>  | 6 (140)                     | 4.29            |
| hsa04912         | GnRH signalling pathway                                   | 9.96x10 <sup>-7</sup>  | 5 (89)                      | 5.62            |
| hsa04510         | Focal adhesion                                            | 1.42x10 <sup>-6</sup>  | 6 (198)                     | 3.03            |
| hsa05142         | Chagas disease                                            | 1.46x10 <sup>-6</sup>  | 5 (99)                      | 5.05            |
| hsa04015         | Rap1 signalling pathway                                   | 1.52x10 <sup>-6</sup>  | 6 (202)                     | 2.97            |
| hsa04660         | T cell receptor signalling pathway                        | 1.53x10 <sup>-6</sup>  | 5 (101)                     | 4.95            |
| hsa04066         | HIF-1 signalling pathway                                  | 1.89x10 <sup>-6</sup>  | 5 (106)                     | 4.72            |
| hsa04722         | Neurotrophin signalling pathway                           | 2.62x10 <sup>-6</sup>  | 5 (114)                     | 4.39            |
| hsa04014         | Ras signalling pathway                                    | 2.65x10 <sup>-6</sup>  | 6 (226)                     | 2.65            |
| hsa04071         | Sphingolipid signalling pathway                           | 2.73x10 <sup>-6</sup>  | 5 (116)                     | 4.31            |
| hsa04910         | Insulin signalling pathway                                | 4.94x10 <sup>-6</sup>  | 5 (133)                     | 3.76            |
| hsa04370         | VEGF signalling pathway                                   | 6.37x10 <sup>-6</sup>  | 4 (57)                      | 7.02            |
| hsa04921         | Oxytocin signalling pathway                               | 7.9x10 <sup>-6</sup>   | 5 (149)                     | 3.36            |
| hsa04929         | GnRH secretion                                            | 8.67x10 <sup>-6</sup>  | 4 (63)                      | 6.35            |
| hsa04664         | Fc epsilon RI signalling pathway                          | 9.84x10 <sup>-6</sup>  | 4 (66)                      | 6.06            |
| hsa04920         | Adipocytokine signalling pathway                          | 1.11x10 <sup>-5</sup>  | 4 (69)                      | 5.80            |
| hsa04662         | B cell receptor signalling pathway                        | 1.72x10 <sup>-5</sup>  | 4 (78)                      | 5.13            |
| hsa04211         | Longevity regulating pathway                              | 2.56x10 <sup>-5</sup>  | 4 (87)                      | 4.60            |
| hsa04657         | IL-17 signalling pathway                                  | 3.13x10 <sup>-5</sup>  | 4 (92)                      | 4.35            |
| hsa04750         | Inflammatory mediator regulation of TRP channels          | 3.35x10 <sup>-5</sup>  | 4 (94)                      | 4.26            |
| hsa04620         | Toll-like receptor signalling pathway                     | 4.28x10 <sup>-5</sup>  | 4 (101)                     | 3.96            |
| hsa04931         | Insulin resistance                                        | 5.18x10 <sup>-5</sup>  | 4 (107)                     | 3.74            |
| hsa04668         | TNF signalling pathway                                    | 6.09x10 <sup>-5</sup>  | 4 (112)                     | 3.57            |
| hsa04919         | Thyroid hormone signalling pathway                        | 7.57x10 <sup>-5</sup>  | 4 (119)                     | 3.36            |
| hsa04611         | Platelet activation                                       | 8.22x10 <sup>-5</sup>  | 4 (122)                     | 3.28            |
| hsa04371         | Apelin signalling pathway                                 | 1.0x10 <sup>-4</sup>   | 4 (131)                     | 3.05            |
| hsa04010         | MAPK signalling pathway                                   | 1.2x10 <sup>-4</sup>   | 5 (288)                     | 1.74            |
| hsa04930         | Type II diabetes mellitus                                 | 1.3x10 <sup>-4</sup>   | 3 (46)                      | 6.52            |
| hsa04150         | mTOR signalling pathway                                   | 1.6x10 <sup>-4</sup>   | 4 (151)                     | 2.65            |
| hsa04217         | Necroptosis                                               | 1.6x10 <sup>-4</sup>   | 4 (149)                     | 2.68            |
| hsa04218         | Cellular senescence                                       | 1.6x10 <sup>-4</sup>   | 4 (150)                     | 2.67            |
| hsa01524         | Platinum drug resistance                                  | 3.9x10 <sup>-4</sup>   | 3 (70)                      | 4.29            |
| hsa04024         | cAMP signalling pathway                                   | 5.0x10 <sup>-4</sup>   | 4 (208)                     | 1.92            |
| hsa04540         | Gap junction                                              | 7.0x10 <sup>-4</sup>   | 3 (87)                      | 3.45            |
| hsa04658         | Th1 and Th2 cell differentiation                          | 7.0x10 <sup>-4</sup>   | 3 (87)                      | 3.45            |
| hsa04152         | AMPK signalling pathway                                   | 0.0017                 | 3 (120)                     | 2.50            |
| hsa04723         | Retrograde endocannabinoid signalling                     | 0.0028                 | 3 (145)                     | 2.07            |
| hsa04072         | Phospholipase D signalling pathway                        | 0.0029                 | 3 (147)                     | 2.04            |
| hsa04530         | Tight junction                                            | 0.0034                 | 3 (156)                     | 1.92            |
| hsa04621         | NOD-like receptor signalling pathway                      | 0.0044                 | 3 (174)                     | 1.72            |
| hsa04973         | Carbohydrate digestion and absorption                     | 0.0047                 | 2 (44)                      | 4.55            |

| DESCRIPTION - KEGG |                                                           | FDR value             | Genes<br>(background genes) | Fold enrichment |
|--------------------|-----------------------------------------------------------|-----------------------|-----------------------------|-----------------|
| hsa04923           | Regulation of lipolysis in adipocytes                     | 0.0068                | 2 (54)                      | 3.70            |
| hsa04810           | Regulation of actin cytoskeleton                          | 0.007                 | 3 (209)                     | 1.44            |
| hsa04720           | Long-term potentiation                                    | 0.0092                | 2 (64)                      | 3.13            |
| hsa04520           | Adherens junction                                         | 0.0098                | 2 (67)                      | 2.99            |
| hsa04666           | Fc gamma R-mediated phagocytosis                          | 0.0165                | 2 (90)                      | 2.22            |
| hsa04922           | Glucagon signalling pathway                               | 0.0199                | 2 (101)                     | 1.98            |
| hsa04928           | Parathyroid hormone synthesis, secretion and action       | 0.0205                | 2 (103)                     | 1.94            |
| hsa04650           | Natural killer cell mediated cytotoxicity                 | 0.0274                | 2 (121)                     | 1.65            |
| hsa04261           | Adrenergic signalling in cardiomyocytes                   | 0.0391                | 2 (147)                     | 1.36            |
| hsa04310           | Wnt signalling pathway                                    | 0.042                 | 2 (154)                     | 1.30            |
| hsa04022           | cGMP-PKG signalling pathway                               | 0.0458                | 2 (162)                     | 1.23            |
| hsa04141           | Protein processing in endoplasmic reticulum               | 0.0471                | 2 (165)                     | 1.21            |
| <b>CLUSTER 2</b>   |                                                           |                       |                             |                 |
| hsa04218           | Cellular senescence                                       | 1.85x10 <sup>-5</sup> | 5 (150)                     | 3.33            |
| hsa04350           | TGF- $\beta$ signalling pathway                           | 4.21x10 <sup>-5</sup> | 4 (91)                      | 4.40            |
| hsa04144           | Endocytosis                                               | 8.0x10 <sup>-4</sup>  | 4 (241)                     | 1.66            |
| hsa04659           | Th17 cell differentiation                                 | 0.0013                | 3 (101)                     | 2.97            |
| hsa04933           | AGE-RAGE signalling pathway in diabetic complications     | 0.0013                | 3 (98)                      | 3.06            |
| hsa05142           | Chagas disease                                            | 0.0013                | 3 (99)                      | 3.03            |
| hsa04110           | Cell cycle                                                | 0.0019                | 3 (120)                     | 2.50            |
| hsa04371           | Apelin signalling pathway                                 | 0.0023                | 3 (131)                     | 2.29            |
| hsa04550           | Signalling pathways regulating pluripotency of stem cells | 0.0026                | 3 (140)                     | 2.14            |
| hsa04390           | Hippo signalling pathway                                  | 0.0032                | 3 (153)                     | 1.96            |
| hsa04010           | MAPK signalling pathway                                   | 0.0168                | 3 (288)                     | 1.04            |
| hsa04520           | Adherens junction                                         | 0.0168                | 2 (67)                      | 2.99            |
| hsa04722           | Neurotrophin signalling pathway                           | 0.0423                | 2 (114)                     | 1.75            |
| hsa04926           | Relaxin signalling pathway                                | 0.0481                | 2 (128)                     | 1.56            |

**Supplemental Table S6: Expression values of analysed miRNAs according to underlying aetiology of CHF**

| miRNA              | Ischaemic CHF (n=14)<br>median [IQR] | Non-ischaemic CHF (n=32)<br>median [IQR] | p-value      | Fold-change (log <sub>2</sub> ) |
|--------------------|--------------------------------------|------------------------------------------|--------------|---------------------------------|
| <i>let-7a-5p</i>   | 0.0001 [0.00006–0.00019]             | 0.00012 [0.00001–0.00043]                | 0.821        | 0.847 (–0.239)                  |
| <i>miR-107</i>     | 0.00002 [0.000002–0.00007]           | 0.00002 [0.000004–0.00005]               | 0.808        | 0.804 (–0.315)                  |
| <i>miR-125a-5p</i> | 0.00012 [0.00006–0.00037]            | 0.00032 [0.00015–0.00061]                | 0.084        | 0.354 (–1.497)                  |
| <i>miR-139-5p</i>  | 0.00005 [0.00004–0.00006]            | 0.00002 [0.00001–0.00004]                | <b>0.022</b> | 1.929 (0.948)                   |
| <i>miR-150-5p</i>  | 0.0026 [0.00098–0.00357]             | 0.00173 [0.00054–0.00407]                | 0.412        | 1.503 (0.588)                   |
| <i>miR-30b-5p</i>  | 0.00054 [0.00018–0.00121]            | 0.00053 [0.00035–0.00136]                | 0.473        | 1.016 (0.023)                   |
| <i>miR-335-5p</i>  | 0.00083 [0.00008–0.00156]            | 0.00064 [0.00023–0.00098]                | 0.741        | 1.289 (0.367)                   |
| <i>miR-342-3p</i>  | 0.00028 [0.00007–0.00059]            | 0.00046 [0.00022–0.0009]                 | 0.169        | 0.611 (–0.710)                  |

CHF: chronic heart failure; IQR: interquartile range  
 Bold indicates statistical significance.

**Supplemental Table S7: Expression values of analysed miRNAs according to CHF ejection fraction**

| <b>miRNA</b>       | <b>HFpEF (n=22)<br/>median [IQR]</b> | <b>HFrfEF (n=24)<br/>median [IQR]</b> | <b>p-value</b> | <b>Fold-change (log<sub>2</sub>)</b> |
|--------------------|--------------------------------------|---------------------------------------|----------------|--------------------------------------|
| <i>let-7a-5p</i>   | 0.00014 [0.00002–0.0003]             | 0.00011 [0.00004–0.00024]             | 0.947          | 1.209 (0.274)                        |
| <i>miR-107</i>     | 0.00001 [0.000002–0.00004]           | 0.00003 [0.00001–0.00009]             | 0.185          | 0.492 (–1.023)                       |
| <i>miR-125a-5p</i> | 0.00031 [0.00015–0.00048]            | 0.00028 [0.00011–0.00062]             | 0.952          | 1.086 (0.119)                        |
| <i>miR-139-5p</i>  | 0.00002 [0.000004–0.00005]           | 0.00004 [0.00001–0.00005]             | 0.264          | 0.624 (–0.681)                       |
| <i>miR-150-5p</i>  | 0.00151 [0.00068–0.00293]            | 0.00278 [0.00098–0.00407]             | 0.130          | 0.546 (–0.874)                       |
| <i>miR-30b-5p</i>  | 0.00036 [0.00021–0.00092]            | 0.00107 [0.00038–0.00156]             | 0.075          | 0.336 (–1.572)                       |
| <i>miR-335-5p</i>  | 0.00065 [0.00032–0.00099]            | 0.00059 [0.00006–0.00144]             | 0.726          | 1.102 (0.140)                        |
| <i>miR-342-3p</i>  | 0.0004 [0.00006–0.00087]             | 0.00047 [0.00013–0.0009]              | 0.601          | 0.849 (–0.236)                       |

**CHF:** chronic heart failure; **HFpEF:** heart failure with preserved ejection fraction; **HFrfEF:** heart failure with reduced ejection fraction; **IQR:** interquartile range

**Supplemental Table S8: Selected miRNAs**

| microRNA              | miRbase ID   | ThermoFisher ID | MiRbase sequence          |
|-----------------------|--------------|-----------------|---------------------------|
| <i>let-7a-5p</i>      | MIMAT0000062 | 478575_mir      | ugagguaguagguuguauaguu    |
| <i>miR-16-5p</i>      | MIMAT0000069 | 477860_mir      | uagcagcacguaaaauuggcg     |
| <i>miR-107</i>        | MIMAT0000104 | 478254_mir      | agcagcauuguacagggcuauc    |
| <i>miR-125a-5p</i>    | MIMAT0000443 | 477884_mir      | ucccugagacccuuuaaccuguga  |
| <i>miR-139-5p</i>     | MIMAT0000250 | 478312_mir      | ucuacagugcacguguccagug    |
| <i>miR-150-5p</i>     | MIMAT0000451 | 477918_mir      | ucucccaaccuuguaccagug     |
| <i>miR-223-3p</i>     | MIMAT0000280 | 477983_mir      | ugucaguuugucaaaauacccca   |
| <i>miR-224-5p</i>     | MIMAT0000281 | 477986_mir      | ucaagucacuagugguuccguuuag |
| <i>miR-30b-5p</i>     | MIMAT0000420 | 478007_mir      | uguaaacauccuacacucagcu    |
| <i>miR-335-5p</i>     | MIMAT0000765 | 478324_mir      | ucaagagcaauaacgaaaaaugu   |
| <i>miR-342-3p</i>     | MIMAT0000753 | 478044_mir      | ucucacacagaaucgcacccgu    |
| <i>cel-miR-39-3p*</i> | MIMAT0000010 | 478293_mir      | ucacggguguaaaucagcuug     |

\*miRNA used for normalisation
